# Supplementary material for: IRF4b and IRF8 Negatively Regulate RLR-Mediated NF-κB Signaling by Targeting MITA for Degradation in Teleost Fish
Source: Frontiers journal article supplement (doi:10.3389/fimmu.2022.858179), 2022-03-03
Supplement: Data_Sheet_2.ZIP [file Data_Sheet_2.ZIP]

## Sheet: Sheet1
Fig. 1B-left	IRF4b levels
	SCRV-0h	SCRV-6h	SCRV-12h	SCRV-24h	SCRV-36h	SCRV-48h	SCRV-72h
first experiment	1	1.045	1.419	2.723	2.138	2.111	2.087
second experiment	0.96	1.142	1.548	2.943	2.214	2.104	1.905
third experiment	1.05	1.093	1.434	2.839	2.194	2.18	1.854
Fig. 1B-middle	IRF8 levels
	SCRV-0h	SCRV-6h	SCRV-12h	SCRV-24h	SCRV-36h	SCRV-48h	SCRV-72h
first experiment	1	1.515	2.581	3.123	1.746	1.955	1.34
second experiment	0.953	1.602	2.582	3.443	1.834	1.834	1.405
third experiment	1.08	1.584	2.745	2.983	1.914	1.935	1.264
Fig. 1B-right	MITA levels
	SCRV-0h	SCRV-6h	SCRV-12h	SCRV-24h	SCRV-36h	SCRV-48h	SCRV-72h
first experiment	1	1.868	7.655	10.702	5.682	2.375	3.335
second experiment	0.94	1.943	7.993	11.432	5.954	2.104	3.017
third experiment	1.07	1.804	7.032	9.932	5.83	2.035	3.414
